# A series of five population-specific Indian brain templates and atlases spanning ages 6 to 60 years

## Authors:

Bharath Holla<sup>1\*#</sup>, Paul A. Taylor<sup>2#</sup>, Daniel R. Glen<sup>2</sup>, John A. Lee<sup>2</sup>, Nilakshi Vaidya<sup>1,9</sup>, Ur-  
vakhsh Meherwan Mehta<sup>1</sup>, Ganesan Venkatasubramanian<sup>1</sup>, Pramod Pal<sup>1</sup>, Jitender Saini<sup>1</sup>, Naren P.  
Rao<sup>1</sup>, Chirag Ahuja<sup>3</sup>, Rebecca Kuriyan<sup>4</sup>, Murali Krishna<sup>5</sup>, Debashish Basu<sup>3</sup>, Kartik Kalyanram<sup>6</sup>,  
Amit Chakrabarti<sup>7</sup>, Dimitri Papadopoulos Orfanos<sup>8</sup>, Gareth J. Barker<sup>9</sup>, Robert W. Cox<sup>2</sup>, Gunter  
Schumann<sup>10</sup>, Rose Dawn Bharath<sup>1\*</sup>, Vivek Benegal<sup>1</sup>

## Affiliations:

<sup>1</sup>National Institute of Mental Health and Neuro Sciences, Bengaluru, India; <sup>2</sup>Scientific and Sta-  
tistical Computing Core, NIMH, NIH, Bethesda, MD, USA; <sup>3</sup>Post Graduate Institute of Medical  
Education and Research, Chandigarh, India; <sup>4</sup>St. John's Medical College and Research Institute,  
Bengaluru, India; <sup>5</sup>CSI Holdsworth Memorial Hospital, Mysore, India; Foundation for Research and  
Advocacy in Mental Health, Mysore, India; <sup>6</sup>Rishi Valley Rural Health Centre, Madanapalle, AP,  
India; <sup>7</sup>ICMR-Regional Occupational Health Centre, Kolkata, India; <sup>8</sup>NeuroSpin, CEA, Université  
Paris-Saclay, Paris, France; <sup>9</sup>Institute of Psychiatry, Psychology and Neuroscience (IoPPN), King's  
College London (KCL), UK; <sup>10</sup>Centre for Population Neuroscience and Stratified Medicine (PONS),  
SGDP Centre, IoPPN, KCL, UK.

## Corresponding Authors:

\*Dr. Bharath Holla, [hollabharath@gmail.com](mailto:hollabharath@gmail.com), Assistant Professor of Psychiatry, NIMHANS, Ben-  
galuru, India;

\*Dr. Rose Dawn Bharath, [drrosedawnbharath@gmail.com](mailto:drrosedawnbharath@gmail.com), Professor of Neuroimaging and Inter-  
ventional Radiology, NIMHANS, Bengaluru, India

#Equally contributing authors.

**Number of figures:** 6

**Number of Tables:** 2

## Highlights

- 1) A new set of age-specific T1w Indian brain templates for ages 6-60 yr are developed and validated.
- 2) A new AFNI tool, `make_template_dask.py`, for the creation of group-based templates.
- 3) Maximum probability map atlases are also provided for each template.
- 4) Results indicate the appropriateness of Indian templates for spatial normalization of Indian brains

32

## Abstract

33

34

35

36

37

38

39

40

41

42

43

44

45

46

47

48

49

50

51

52

Anatomical brain templates are commonly used as references in neurological MRI studies, for bringing data into a common space for group-level statistics and coordinate reporting. Given the inherent variability in brain morphology across age and geography, it is important to have templates that are as representative as possible for both age and population. A representative-template increases the accuracy of alignment, decreases distortions as well as potential biases in final coordinate reports. In this study, we developed and validated a new set of T1w Indian brain templates (IBT) from a large number of brain scans (total n=466) acquired across different locations and multiple 3T MRI scanners in India. A new tool in AFNI, `make_template_dask.py`, was created to efficiently make five age-specific IBTs (ages 6-60 years) as well as maximum probability map (MPM) atlases for each template; for each age-group's template-atlas pair, there is both a "population-average" and a "typical" version. Validation experiments on an independent Indian structural and functional-MRI dataset show the appropriateness of IBTs for spatial normalization of Indian brains. The results indicate significant structural differences when comparing the IBTs and MNI template, with these differences being maximal along the Anterior-Posterior and Inferior-Superior axes, but minimal Left-Right. For each age-group, the MPM brain atlases provide reasonably good representation of the native-space volumes in the IBT space, except in a few regions with high inter-subject variability. These findings provide evidence to support the use of age and population-specific templates in human brain mapping studies. This dataset is made publicly available (<https://hollabharath.github.io/IndiaBrainTemplates>).

53

**Keywords:** MRI, brain template, brain atlases, maximum probability map

54

## 1 Introduction

55

56

57

58

59

60

61

62

The shape, size and volume of the human brain is highly variable across individuals, as well as across age, gender and geographical location or ethnicity. This fact is of prime importance in neuroimaging group studies, where the brains of all subjects are typically aligned to a single template space for data analysis and for the reporting of findings where analogous anatomical structures are mapped on to the same coordinate location across the subjects. A brain template provides a standard 3D coordinate frame to combine and/or compare data from many subjects, across different imaging modalities, structural or functional and even different laboratories around the world. The properties of the template (size, shape, tissue contrast, etc.) directly affect the quality of alignment.

63

64

65

An early brain atlas was constructed by [Talairach and Tournoux \[1988\]](#) from a post mortem brain of one 60-year-old French woman, introducing the concepts of coordinate system and spatial transformation to brain imaging. However, using a single subject brain as a template introduces several

66 idiosyncrasies, as it does not account for groupwide anatomical variability, asymmetry, age-related  
67 differences, etc. In order to address some of these issues, a subsequent initiative from the Montreal  
68 Neurological Institute (MNI) resulted in a statistical brain template (MNI-305) using 305 young  
69 right-handed subjects [Evans et al., 1993]. While this composite template better accounted for  
70 anatomical variability, it also had relatively low tissue contrast and structural definition, which  
71 can affect the ability of alignment algorithms to provide high quality anatomical matching across a  
72 group study. In 2001, the international consortium for human brain mapping (ICBM) introduced  
73 the revised MNI-152 template [Mazziotta et al., 2001b] with better contrast and structure defini-  
74 tion, where 152 individual brains were linearly registered to MNI305 to make an average template.  
75 The ICBM-452 template [Mazziotta et al., 2001a] included all three sites of ICBM and provided  
76 even better signal-to-noise ratio due to the nearly threefold increase in the number of subjects.  
77 These MNI templates were widely adopted by several image processing pipelines, with the asso-  
78 ciated set of coordinates known as “MNI space”. Furthermore, an unbiased non-linear average of  
79 the adult MNI152 and a pediatric template with 20-40 iterative non-linear averages has also been  
80 made available [Fonov et al., 2011]. These templates provide the advantages of retaining group  
81 representativeness of the MNI305 or MNI152 while still providing the details that are closer to  
82 those apparent in a single subject; however, their “representativeness” is limited to a fairly isolated  
83 geographic location and (typically, Western) population, even though neuroimaging studies draw  
84 from populations across the globe.

85 More recently, several research groups around the world have developed and validated brain tem-  
86 plates that are representative of their (broadly) local population. Lee et al. [2005] created a set  
87 of Korean Brain templates with 78 subjects in an age range between 18 to 77 years (young tem-  
88 plate <55 years and elderly template >55 years). Additionally, Tang et al. [2010] generated a  
89 Chinese brain template of 56 subjects (mean age 24.4 years). In each case the groups demonstrated  
90 significantly reduced warp deformations and increased registration accuracy when applying these  
91 templates to studies of local populations. It should be noted that even though the templates draw  
92 from subjects within a population, there is still a large amount of inherent variability evident in the  
93 brain morphology, due to combinations of factors such as inherent structural variability, multi-ethnic  
94 composition and differences in genetic influences and environmental exposures.

95 The benefit of utilizing a population-representative template in the Indian context has also been  
96 recognized, with the additional need for age-specific templates due to the increasingly wide range  
97 of ages enrolled in studies. Recent attempts at developing brain templates for Indian population  
98 have tended to focus on the young adult age group (21-30 years) with relatively small [Rao et al.,  
99 2017] to modest sample sizes [Sivaswamy et al., 2019, Bhalerao et al., 2018, Pai et al., 2020], and  
100 have utilized data from a single site/scanner. Additionally, to date, whole-brain annotated reference  
101 atlases based on segmentation have not accompanied the generated templates. In this study, we

102 present and validate a new set of brain templates that have been created from a large number  
103 of subjects from multi-site acquisitions across India, with five age ranges provided (between 6-60  
104 years), as well as brain atlases for each template. For each age group’s template-atlas pair, there is  
105 both a “population average” and “typical” version (the latter being the individual brain which most  
106 closely matches the population average, which potentially provides higher detail as an alignment  
107 target and atlas). We present several validation tests for the accuracy and representativeness of the  
108 templates, and we also use data from separately acquired subjects to demonstrate the benefits of  
109 these templates over the existing standard MNI templates for studies on Indian cohorts.

## 110 **2 Methods**

### 111 **2.1 Participants**

112 The datasets used in the present study were selected retrospectively from healthy control subjects  
113 of several imaging studies, across multiple centers and different populations across India. They in-  
114 cluded imaging data from the ongoing Indian multi-site developmental cohort study, the Consortium  
115 on Vulnerability to Externalising Disorders and Addictions (cVEDA) [Sharma et al., 2020, Zhang  
116 et al., 2020] and from stored datasets contributed by researchers at the National Institute of Mental  
117 Health and Neurosciences (NIMHANS, Bengaluru, India). All of these studies were approved by  
118 the ethics review boards at the corresponding participating sites and informed consent was obtained  
119 from each participant (or from their parent, in the case of subjects below 16 years, along with par-  
120 ticipant’s written assent) with a specific request to collect, store and share anonymized data for  
121 research. Inclusion criteria included not having a personal history of prior brain injury, neurological  
122 disorder or psychiatric diagnosis. The sample was comprised of 466 subjects from a large number  
123 of states across India and acquired at multiple sites. Based on age and demographic distributions,  
124 subject datasets were divided into 5 groups: C1, late childhood (6-11 years); C2, adolescence (12-18  
125 years); C3, young adulthood (19-25 years); C4, adulthood (26-40 years); C5, late adulthood (41-60  
126 years). The sample size and demographic information of each cohort is summarized in Table 1.

### 127 **2.2 Image acquisition**

128 T1-weighted (T1w) three-dimensional high resolution structural brain MRI scans were acquired  
129 from five 3T MRI scanners located at three different locations across India: Bengaluru (site A, C  
130 and D), Mysuru (site B) and Chandigarh (site E). The subjects belonged to several neighboring  
131 states to these locations, with wide geographical representation throughout India. As with most

**Table 1** Demographic Profiles.

| Age Category | Age Description | Age in years, Mean (Range) | Sample Size $N$ (% Female) | No. States | No. Scanners |
|--------------|-----------------|----------------------------|----------------------------|------------|--------------|
| C1           | Late childhood  | 9.3 (6 to 11)              | 28 (46.43%)                | 5          | 4            |
| C2           | Adolescence     | 15.1 (12 to 18)            | 106 (47.17%)               | 9          | 5            |
| C3           | Young adulthood | 21.3 (19 to 25)            | 181 (40.89%)               | 15         | 5            |
| C4           | Adulthood       | 31.1 (26 to 40)            | 89 (42.7%)                 | 11         | 2            |
| C5           | Late adulthood  | 52.7 (41 to 60)            | 62 (43.55%)                | 6          | 2            |

**Table 2** Acquisition parameters.

| Acq Seq | Site label | Scanner model        | dx (mm) | dy (mm) | dz (mm) | TR <sup>†</sup> (ms) | TE (ms) | TI (ms) | FA (deg) | Matrix size | No. Sag | No. Subj <sup>‡</sup> |
|---------|------------|----------------------|---------|---------|---------|----------------------|---------|---------|----------|-------------|---------|-----------------------|
| 1       | A          | Achieva <sup>a</sup> | 1       | 1       | 1       | 8.2                  | 3.8     | 745     | 8        | 256 × 256   | 165     | 50                    |
| 2       | A          | Achieva <sup>a</sup> | 0.9     | 0.9     | 1       | 8.2                  | 3.8     | 800     | 8        | 257 × 256   | 160     | 38                    |
| 3       | B          | Ingenia <sup>a</sup> | 1.2     | 1       | 1       | 6.9                  | 3.2     | 725     | 9        | 256 × 256   | 170     | 29                    |
| 4       | C          | Ingenia <sup>a</sup> | 1       | 1       | 1       | 6.9                  | 3.3     | 925     | 9        | 256 × 256   | 211     | 10                    |
| 5       | D          | Skyra <sup>b</sup>   | 1.2     | 1       | 1       | 2300                 | 3.0     | 900     | 9        | 256 × 240   | 176     | 82                    |
| 6       | D          | Skyra <sup>b</sup>   | 1       | 1       | 1       | 1900                 | 2.4     | 900     | 9        | 256 × 256   | 192     | 56                    |
| 7       | D          | Skyra <sup>b</sup>   | 0.9     | 0.9     | 0.9     | 1600                 | 2.1     | 900     | 9        | 256 × 256   | 176     | 124                   |
| 8       | E          | Verio <sup>b</sup>   | 1.2     | 0.5     | 0.5     | 2300                 | 3.0     | 900     | 9        | 512 × 480   | 176     | 77                    |

Acq Seq = acquisition sequence; dx, dy, dz are voxel dimensions; TR = repetition time; TE = echo time; TI = inversion time; FA = flip angle; No. Sag = number of sagittal slices.

<sup>a</sup>Philips, 3T. <sup>b</sup>Siemens, 3T. <sup>‡</sup>This is the final number of subjects included in final templates (total = 466), after all steps of QC and subject removal. <sup>†</sup>The TR for 3D scans such as these is defined differently between Philips and Siemens scanners, with the relationship being  $TR_{\text{Philips}} \approx (TR_{\text{Siemens}} - TI)/(No. \text{ Sag})$ .

132 multisite studies, the acquisition parameters varied slightly across sites and scanners, but were  
 133 generally similar, with good grey/white matter contrast with a voxel size close to 1mm isotropic;  
 134 details are listed in Table 2.

### 135 2.3 Data Preprocessing and Initial Quality Assurance

136 This processing primarily used programs in the AFNI (v19.0.20) [Cox, 1996] and FreeSurfer (v6.0)  
 137 [Fischl, 2012] neuroimaging toolboxes, as well as the “dask” scheduling tool in Python developed by  
 138 the Dask Development Team [2016]. Unless otherwise noted, programs named here are contained  
 139 within the AFNI distribution. The following processing steps are shown schematically in Figure 1,  
 140 in the first column.

141 Datasets were first processed using AFNI’s “fat\_proc\_convert\_dcm\_anat”. Using this, DICOMs  
142 were converted to NIFTI files using dcm2niix\_afni (the AFNI-distributed version of dcm2niix [Li  
143 et al., 2016]). For uniformity and initialization, with this tool, they were also given the same  
144 orientation (RAI), and the physical coordinate origin was placed at the volume’s center of mass (to  
145 simplify later alignments).

146 Next, “fat\_proc\_axialize\_anat” was applied to reduce the variance in the spatial orientation of  
147 brains for later alignment and for practical considerations of further processing steps, as described  
148 here. Each volume was affinely registered to a reference anatomical template (MNI ICBM 152  
149 T1w) that had previously been AC-PC aligned; alignment included an additional weight mask  
150 to emphasize subcortical structure alignment (e.g., AC-PC structures), and only the solid-body  
151 parameters of the alignment were applied, so that no changes in shape were incurred. Because  
152 datasets had been acquired with varied spatial resolution and FOV (see Table 2), the datasets were  
153 resampled (using a high-order sinc function, to minimize smoothing) to the grid of the reference  
154 base of 1mm isotropic voxels.

155 All datasets were visually and systematically checked for quality of both data and registration using  
156 the QC image montages that were automatically generated by the previous program. T1w volumes  
157 with noticeable ringing or other artifact (e.g., due to subject motion or dicom reconstruction errors)  
158 were noted and removed from further analyses. T1w volumes with any incidental findings (for  
159 example, large ventricles, cavum septum pellucidum) were also removed.

160 FreeSurfer’s “recon-all” [Fischl, 2012] was run on each T1w data set to estimate surfaces, parcel-  
161 lation and segmentation maps. AFNI’s “@SUMA\_Make\_Spec\_FS” was then run to convert the  
162 FreeSurfer output to NIFTI files and to generate standard meshes of the surface in formats usable  
163 by AFNI and SUMA. Additionally, @SUMA\_Make\_Spec\_FS subdivides the FreeSurfer parcella-  
164 tions into tissue types such as gray matter (GM), white matter (WM), cerebrospinal fluid (CSF),  
165 ventricle, etc. This was followed by visual inspection of parcellation maps overlaid on anatomical  
166 volumes.

167 Next, a whole brain mask of each anatomical volume was created. In several cases, the skullstripped  
168 brain volumes output by recon-all (brain\_mask.nii) included large amounts of non-brain material  
169 (skull, dura, face, etc.), and so an alternative mask was generated using only the ROIs comprising  
170 the parcellation and segmentation maps. For each subject, a whole brain mask was generated by:  
171 first making a preliminary mask from all of the ROIs identified by recon-all; then inflating that pre-  
172 mask by 3 voxels; and finally shrinking the result by two voxels (thus filling in any holes inside the  
173 brain mask and smoothing the outer edges). This produced whole brain masks that were uniformly  
174 specific to each subject’s intracranial volume.

175 Finally, AFNI's 3dUnifize was run on each T1w volume in order to reduce the intensity inhomogeneity (e.g., due to the bias field) and to normalize the intensity of tissues within the volume. This ensures that each subject's brain, which had been acquired on different scanners with potentially different scalings, would have equal weight when averaging (e.g., WM is scaled to approximately a value of 1000 in each brain, and similarly for other tissues), and also reduces the risk of a bright outlier region driving poor alignment.

## 181 **2.4 Mean template generation**

182 After the above pre-processing steps and QC, the following templating algorithm was applied for each cohort (C1-5) separately. The general procedure was to alternate between alignment to a reference base (with increasingly higher order of refinement) and averaging the aligned brains to generate a new reference base for the subsequent iteration. In this way one can generate a cohort mean template of successively greater specificity and detail; after several iterations, the alignment essentially converges (i.e., additional refinement becomes negligible) and is halted. Warps were generated and saved at each step. The final nonlinear warps and affine transformations were concatenated for each subject at the end in order to generate the final group average template. These steps are also included in the schematic Figure 1, in the first column (bottom) and second and third columns.

192 The first level of alignment was made from each anatomical in the cohort to the MNI ICBM-152 T1w template using a 6 degree of freedom (DF) rigid body equivalent registration, meaning a full affine transformation was computed, but only the rigid components were extracted and applied. The average of all subjects' brains, rigidly aligned to the initial template, was used to create a single average volume "mean-rigid"; here and at each alignment stage, a cohort standard deviation map was also created, to highlight locations of relatively high and low variability. That stage's average volume was then used as a base for the next stage of alignment for each subject, using a 12 DF linear affine registration, and with the results averaged to create the next base "mean-affine". For these alignments, AFNI's "lpa" cost function (absolute value of local Pearson correlation) [Saad et al., 2009] was used for high quality alignment of features between volumes of similar contrast. The cost function computes the absolute value of the Pearson correlation between the volume and the current template in patches of the volume at a time.

204 As a practical consideration, we note that lower level alignments such as these have a general property of producing a smoothed brain, which has the additional effect of increasing the apparent size of the base dataset (i.e., the edge is blurred outward). Therefore, in these initial levels we added a step to control the overall volume of the template. We calculated the mean intracranial

208 volume (ICV) of all the subjects in the cohort  $V_{\text{coh}}$ , and then calculated the volume of the initial  
209 mean-affine brain mask  $V_{\text{aff}}$ . The volume ratio  $r_{\text{vol}} = V_{\text{coh}}/V_{\text{aff}}$  was calculated, and each of the  
210 three dimensions of the mean-affine volume were scaled down by the appropriate length scaling  
211 factor  $r_{\text{vol}}^{1/3}$ . In this way, the final volume of the templating process retained a representative size  
212 for the cohort.

213 The next alignment stages were comprised of nonlinear registration using AFNI's 3dQwarp [Cox  
214 and Glen, 2013]. At each successive level the nonlinear alignment was performed to an increasingly  
215 higher refinement, resulting in mean volumes of greater detail. Specifically, nonlinear alignment at  
216 each stage was implemented to create mean templates as follows (A-E), using 3dQwarp's default  
217 "pcl" (Pearson correlation, clipped) cost function to reduce the effects of any outlier values (and  
218 unless otherwise specified, applying a 3D Gaussian blur):

- 219 A) **mean-NL0**: after registering to mean-affine with a minimum patch size of 101 mm and blurring  
220 of 0 mm (base) and 9 mm (source);
- 221 B) **mean-NL1**: after registering to mean-NL0 with a minimum patch size of 49 mm and blurring  
222 of 1 mm (base) and 6 mm (source);
- 223 C) **mean-NL2**: after registering to mean-NL1 with a minimum patch size of 23 mm and blurring  
224 of 0 mm (base) and 4 mm (source);
- 225 D) **mean-NL3**: after registering to mean-NL2 with a minimum patch size of 13 mm and blurring  
226 of 0 mm (base) and 2 mm median filter (source);
- 227 E) **mean-NL4**: after registering to mean-NL3 with a minimum patch size of 9 mm and blurring  
228 of 0 mm (base) and 2 mm median filter (source).

229 Each mean-NL\* volume was resized in the same manner as the initial stages, although the correction  
230 factors were much smaller here. Additionally, each mean-NL\* volume was anisotropically smoothed  
231 (preserving edges within the volume, for detail) using 3danisosmooth, in order to sharpen its contrast  
232 for subsequent alignments.

233 The mean-NL4 volume became the final group mean template for each cohort, as in all cases results  
234 appeared to have essentially converged after this number of step. The coordinate system of this  
235 mean volume defines the template space for that age group, and is labelled "IBT\_C1", "IBT\_C2",  
236 etc.



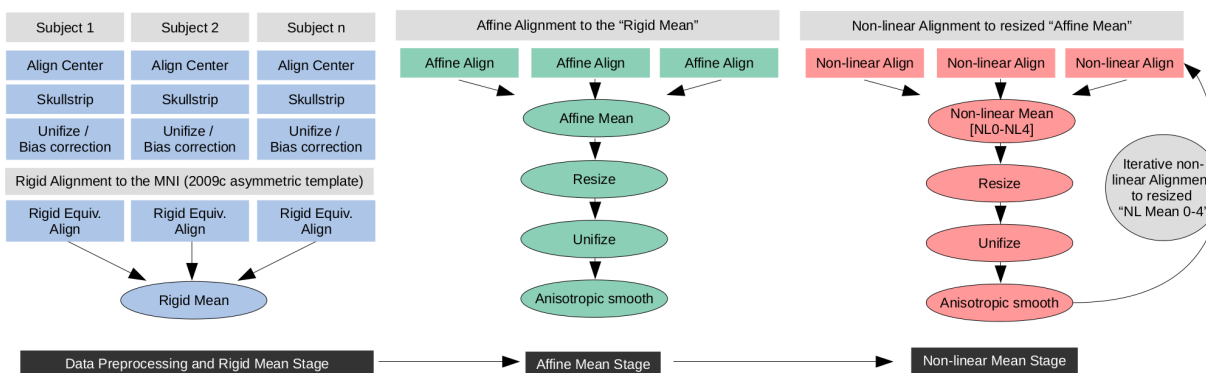

**Figure 1** – Schematic representation of the steps involved in the Dask pipeline (make\_template\_dask.py) for generating population-average brain templates.

## 2.5 “Typical” subject template generation

We used the following approach to find the maximally representative individual brain for the mean template from the underlying cohort, in order to generate an additional “typical” template for that space, in complement to the mean template.

To find the most typical subject for the mean template quantitatively, the lpa cost function value from aligning each subject’s anatomical to the final mean-NL4 was compared across the group; that is, the degree of similarity of each subject’s aligned volume to the mean template base was compared across the cohort. The individual brain in that mean template space with the lowest cost function value was selected to be the “typical template” brain. Alignment results were also visually verified for each typical template. We note that the typical template volume uses the same coordinate system as the mean template, and thus no additional “coordinate space” is created in this process.

## 2.6 Atlas generation for mean and typical templates

For each cohort, atlases were generated for each of the mean and typical templates based on FreeSurfer parcellation and segmentation maps<sup>1</sup>. By default, recon-all produces two maps of ROIs (including both cortical and subcortical GM, WM, ventricles, etc.): the “2000” map, using the Desikan-Killiany Atlas [Desikan et al., 2006] and the “2009” map, using the Destrieux Atlas [Destrieux et al., 2010]. Each of these maps was used to create a “2000” and “2009” atlas for each template.

For the mean template, maximum probability map (MPM) atlases were reconstructed as follows.

<sup>1</sup>FreeSurfer distinguishes between cortical parcellations and subcortical segmentations; here, we use “parcellation” generically to refer to final map of all ROIs.

256 The FreeSurfer parcellations for each subject were transformed to the IBT space using the warps  
257 created during the template creation process (and “nearest neighbor” interpolation, to preserve  
258 ROI identity). For a given parcellation, the fraction of overlap of a given ROI at each voxel in the  
259 template was computed. That overlap fraction is essentially the probability of a region to be mapped  
260 to that voxel. In this way, an MPM atlas was created for each of the 2000 and 2009 parcellations,  
261 labelled “IBT\_C1\_MPM\_2000”, “IBT\_C1\_MPM\_2009”, etc. The value of each voxel’s maximum  
262 probability was also kept and stored in a map, for reference and validation. Locations with max  
263 probability near 1 show greatest uniformity across group, and locations with lower values show  
264 greater variability.

265 For each typical template volume, atlases based on the 2000 and 2009 FreeSurfer parcellation were  
266 also created. First, the parcellations from original subject space were mapped to the individual  
267 template space. Then, each parcellation was passed through a modal smoothing process using  
268 3dLocalstat: for each voxel in the atlas, its value was reassigned to the mode of its NN=1 neigh-  
269 borhood (i.e., among “facewise” neighbors, so within a 7 voxel neighborhood). In this way the  
270 final atlas parcellation was slightly regularized, in order to reduce the effects of resampling to the  
271 template space. A typical brain atlas was created from each of the 2000 and 2009 parcellations,  
272 labelled “IBT\_C1\_TYP\_2000”, “IBT\_C1\_TYP\_2009”, etc.

## 273 2.7 Validation and tests

274 The fractional volumes of each ROI in the MPM atlases were checked for being representative of  
275 each cohort. For this we calculated the logarithm of the relative volume ratio of each ROI:

$$r_i = \log \left( \frac{V_{\text{MPM},i} / V_{\text{MPM,ICV}}}{\frac{1}{N} \sum_j V_{j,i} / V_{j,\text{ICV}}} \right), \quad (1)$$

276 where the numerator is the fractional volume of a given  $i$ th ROI in the MPM (i.e., volume of the  
277 ROI divided by that template’s ICV), and the denominator is the fractional volume of that  $i$ th  
278 ROI averaged across all  $N$  subjects (i.e., for each  $j$ th subject, volume of the ROI divided by the  
279 subject’s ICV, in native space). Thus,  $r_i$  values close to 0 reflect high similarity of the MPM ROI  
280 to the cohort mean, and negative or positive values reflect a relative compression or expansion,  
281 respectively, of the MPM ROI relative to that for a particular cohort.

282 In order to quantify the inter-subject brain morphological variability for participants in each age-  
283 band, we calculated a region-wise mean deformation value (mDV) from the deformation warp fields  
284 generated during non-linear registration to the age-specific IBT. For this, the absolute warp value

285 was summed across all three axes (L1-norm) and averaged across all the voxels within each ROI  
286 in the age-specific MPM atlas. A larger mDV indicates greater inter-subject brain morphological  
287 variability.

288 To examine the utility of the IBTs on a real, representative dataset, a separate sample of Indian  
289 population data was included for validation and testing purposes. For each cohort, the validation  
290 group (“V1”, matched with cohort C1; “V2”, matched with cohort C2; etc.) comprised 20 subjects  
291 within the corresponding age range. The T1w and resting state functional MRI (rs-fMRI) data  
292 acquisition information and demographics of these additional groups are provided in supplementary  
293 text. For each IBT, in comparison to the MNI ICBM-152 template, the following validation tests  
294 were conducted using the T1w and resting functional data.

295 We first used the deformation field to characterize the difference between the two templates (IBT vs  
296 MNI). For each subject in the validation cohort, we calculated the absolute amount of displacement  
297 needed to move a voxel location from native space to the target in the new age-specific IBT and  
298 the standard MNI ICBM-152 templates, for non-linear registration. A median absolute distance  
299 along each axis (LR = left-right; PA = posterior-anterior; IS = inferior-superior) was calculated  
300 from the dimensional deformation field in each voxel. The median absolute distances when warping  
301 to MNI and cohort-specific IBT along each axis were compared using a paired sample Wilcoxon’s  
302 signed-ranks test.

303 Finally, the practical benefits of using the IBT as reference volume for fMRI alignment were inves-  
304 tigated by processing resting state fMRI data from age-specific validation cohorts using the same  
305 pipeline twice: once with the IBT, and once with the standard MNI template. AFNI’s `afni_proc.py`  
306 command was used to generate the full fMRI processing pipeline and the exact command is pro-  
307 vided in the supplementary text. We used AFNI’s 3dReHo [Taylor and Saad, 2013] to calculate a  
308 common resting state fMRI parameter, ReHo (region homogeneity, which is Kendall’s Coefficient  
309 of Concordance,  $W$ , in statistics [Kendall and Smith, 1939, Zang et al., 2004]), within each atlas  
310 ROI for the data in each of the IBT and MNI spaces (as per template-specific Desikan-Killiany At-  
311 las, which exists in both spaces). We then performed a paired t-test comparison on the ROI-ReHo  
312 values, in order to compare ReHo values between template space targets. In the current pair-wise  
313 comparisons, a greater ReHo would indicate greater temporal coherence of BOLD time series, likely  
314 due improvement in overall alignment across subjects within each ROI.

### 315 3 Results

316 The first part of the output consists of both “population average” and “typical” Indian brain tem-  
317 plates for five specific age-ranges: late-childhood (C1), adolescence (C2), young adulthood (C3),  
318 adulthood (C4) and late adulthood (C5) [see Table 1 for the age-ranges]. The second part of the  
319 output is a set four IBT atlases (IBTAs) for each age range: both an MPM and a typical subject  
320 version of each of the Desikan-Killiany (FreeSurfer’s “2000”) and Destrieux (FreeSurfer’s “2009”)  
321 atlases.

322 Figure 2 shows an example of the successive stages in the creation of the C1 IBT. Throughout  
323 the refinement, details become progressively clearer, with tissue contrast and feature identification  
324 increasing. Additionally, the variance decreases in the gray and white tissues with each stage. The  
325 contrast-to-noise ratio (CNR) between GM and WM improved through the successive stages in all  
326 the template age-groups (see Supplementary Figure S1).

327 Figure 3 shows an example of the IBT and IBTA outputs for the C3 group, displaying multiple slices  
328 in sagittal, coronal and axial views; in all cases, the population average template is underlayed. The  
329 top row shows a size comparison with the overlaid MNI template (shows as edges). In the second row,  
330 the “typical” template version is overlaid translucently, showing the very high degree of structural  
331 similarity between the two template versions. The bottom two rows show the MPM 2000 and 2009  
332 IBTAs. Similar outputs for other age groups are provided in the Supplementary Information, in  
333 Figures S2-S6.

334 Figure 4’s left panel displays the logarithm of the relative volume ratio of each ROI in the IBT MPM  
335 atlas (see Eq. (1)), showing how representative the atlas is of each cohort in a region-wise manner. As  
336 shown in the figure, most cortical regions have values close to zero, indicating that MPM ROIs in the  
337 IBT space provide representative volumes of the native space ROIs for each age group. The largest  
338 expansions were observed in the bilateral caudal and rostral middle frontal gyrus, bilateral rostral  
339 anterior cingulate, bilateral superior and inferior parietal cortices across the age groups. These are  
340 also the regions that show greater mDV (Figure 4’s right-panel) indicating that greater inter-subject  
341 variability could be in part responsible for greater volumetric differences between native-space and  
342 MPM volumes. The scatter-plots in Supplementary Information (Figure S7) indicates that there  
343 were significant correlations between relative volume ratios and mDV for each age group ( $R$ -values:  
344 0.24-42 and  $p$ -values  $<0.05$  ).

345 Figure 5A-E shows the comparison of warp distances from the anatomical (T1w) volumes of the  
346 validation cohorts (V1-5) to each of the age-matched IBT “population mean” templates (orange),  
347 vs the V1-5 warp distances to the standard MNI template (blue); for more detailed comparison,

### Templatizing stages: C1 group

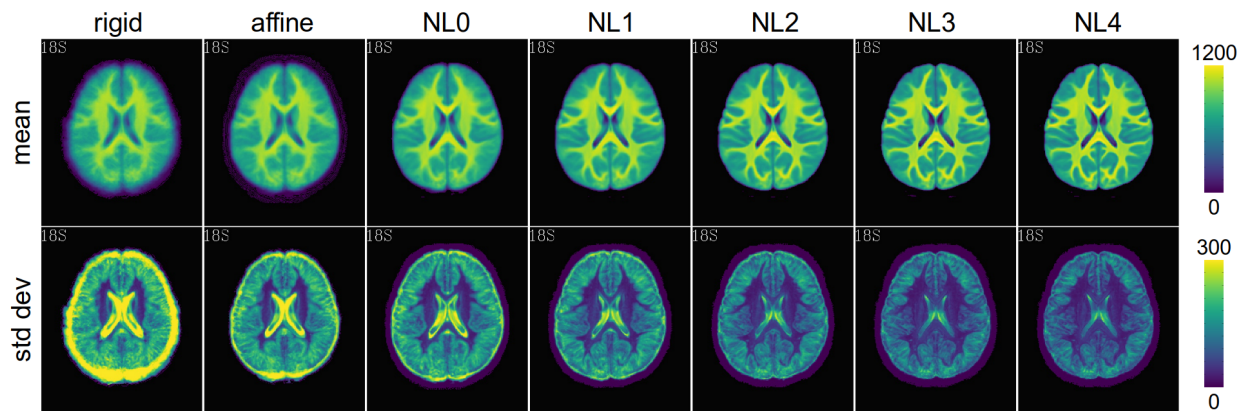

**Figure 2** – Axial slices of mean (top row) and standard deviation (bottom row) maps through successive stages of the templating algorithm (first stage at the left) for the C1 age-band. Note that the mean and standard deviation maps have separate scales, to show details more clearly in each.

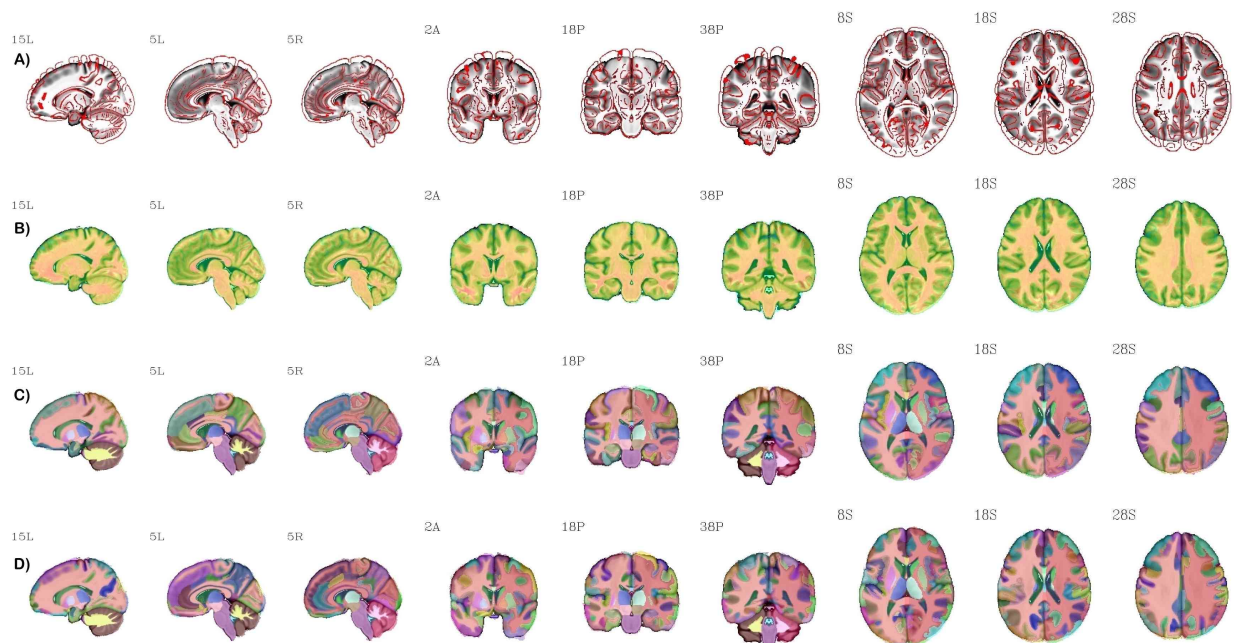

**Figure 3** – Three sets of sagittal, coronal and axial views of the “population-average” C3 IBT, displayed as underlay in grayscale in each row (A-D). Row A depicts the edge-filtered version of the MNI 2009 nonlinear template as overlay for size comparison. Row B shows the “typical” IBT C3 dataset as a translucent overlay; note the very high degree of structural similarity, as expected. The Indian MPM version of the DK atlas (FreeSurfer’s 2000 atlas) is shown in row C as overlay and Destrieux atlas (FreeSurfer’s 2009 atlas) as overlay in row D.

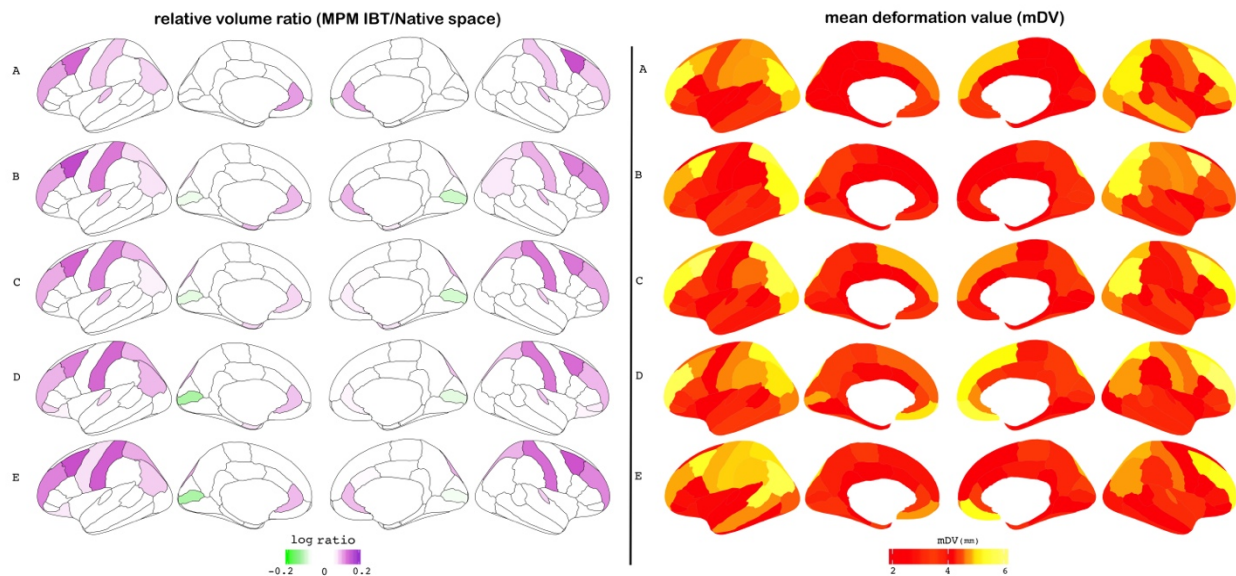

**Figure 4** – Evaluation of the region-wise similarity of the MPM volumes as measured (left panel) by the relative volume ratio for each ROI via Eq. (1), and (right panel) by mean deformation value (mDV) of each ROI; rows A-E show results for each age-specific group C1-C5, respectively. In the left-panel ROIs with notably different volume fractions are highlighted in purple (increases) and green (decreases), and in the right-panel ROIs with greater inter-subject variability are shown as increasingly yellow.

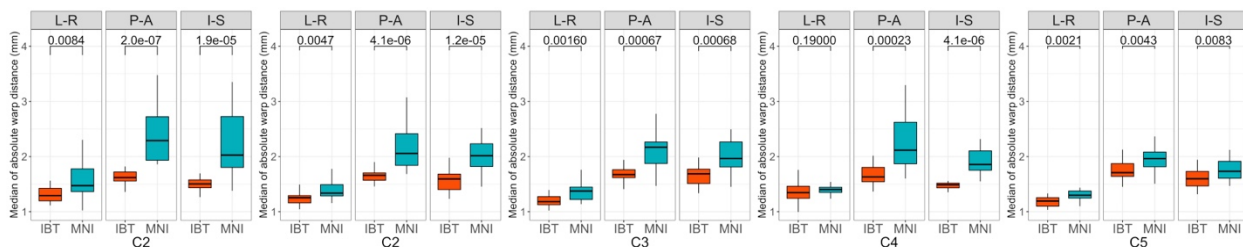

**Figure 5** – Validation cohort T1w results: A-E) IBT-based results are in orange, and MNI-based results in blue. Wilcoxon’s signed-ranks test was used to compare the distributions;  $p$ -values are shown at the top of each panel. For each validation group (V1-5), boxplots of the median warp magnitude along each major axis (LR, PA, IS) to a given template are shown in panel A-E. The warp distributions to MNI space are significantly larger along the AP and IS axes in all cases. While the differences tend to be smallest along the LR axis (particularly for C4), warps to MNI are nevertheless significantly larger for 4/5 of the cohorts along this axis, as well.

348 average warp distances along each of the main volumetric axes are shown separately. In all cases,  
 349 alignment to an IBT dataset required much less overall displacement on average. Warps to MNI  
 350 were highly significantly greater ( $p < 0.05$ , corrected for  $N = 3 \times 5$  multiple comparisons) along the  
 351 PA and IS axes in all cases. Along the LR axes, differences were smaller but still significant at the  
 352 same level for 4/5 cohorts (again, warps to MNI being larger); the C4 cohort showed no significant  
 353 difference along the LR axis, but overall differences for this group were still large, due to the warps

354 along the other axes.

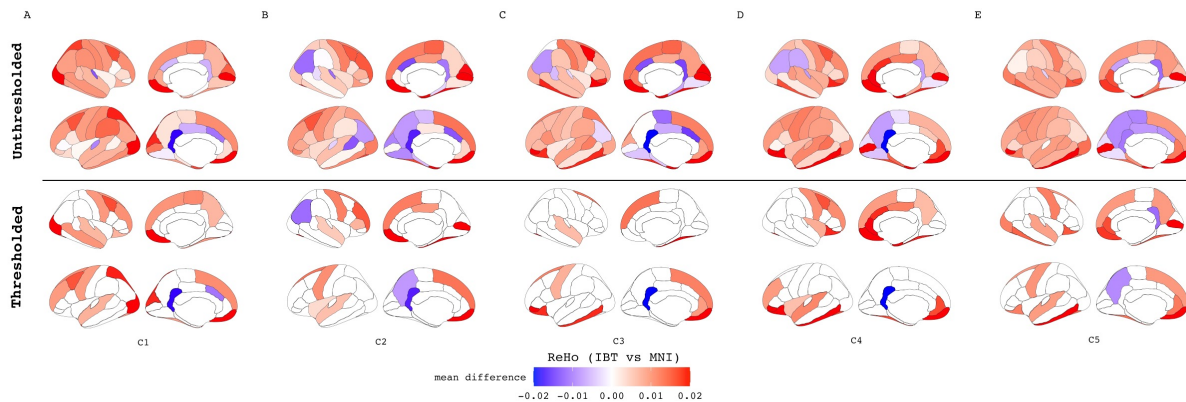

**Figure 6** – Validation cohort fMRI results. A-E) Comparison of the region-wise ReHo values in the IBT vs MNI space for each validation group C1-C5. The colors indicate the directions and magnitude of the mean difference of ReHo values between IBT vs MNI. The unthresholded results are in top panel and Bonferroni corrected results are in the bottom panel. The warm-red color indicates regions where the ReHo values are greater in IBT and cool-blue colors are those where ReHo values are greater in MNI. The ReHo provides a measure of local FC as index of temporal coherence (Kendall’s coefficient of concordance) of the BOLD time series within a set of a given voxel’s nearest neighbors in an ROI.

355 Finally, we investigated the practical difference when using IBT vs MNI as a template space for fMRI  
356 processing, using the validation cohorts. ReHo values were compared between corresponding ROIs  
357 in the IBT and MNI spaces, and the paired t-tests of the values showed that each IBT tended to  
358 have higher ReHo values throughout most regions of the brain. These results are shown in Figure 6.  
359 While some medial and anterior regions showed higher ReHo in the MNI space, the overall greater  
360 ReHo values in the IBT space may be the result of slightly improved alignments on average, so that  
361 more similar time series are grouped together per ROI.

## 362 4 Discussion

363 We have introduced five new India brain template (IBTs) spaces, spanning an age range from 6-60  
364 years. Additionally, corresponding atlases (IBTAs) from widely used segmentations were also created  
365 for each space. These should form useful reference templates and region maps for brain imaging  
366 studies involving predominantly Indian populations. Both the creation of age-specific templates and  
367 the inclusion of associated atlases make the present study distinct from previous Indian population  
368 brain template projects [Rao et al., 2017, Bhalerao et al., 2018, Sivaswamy et al., 2019, Pai et al.,  
369 2020]; additionally, we have generated both “population mean” and high-contrast “typical” templates

370 for each age band. The IBT volumes and corresponding atlases are publicly available for download,  
371 in standard NIFTI format, and freely usable by the wider neuroimaging community.

372 The need for age-specific templates in particular has been recognized across different populations  
373 [Fonov et al., 2011, Wilke et al., 2002, Yoon et al., 2009]; however, Indian versions of age-specific  
374 brain templates have not been available to date. While adult brain templates may still provide  
375 reasonably accurate anatomical priors for normalizing lower resolution smoothed functional data,  
376 they may not be appropriate for high resolution structural and functional data [Wilke et al., 2002].  
377 For example, Yoon et al. [2009] examined the “template effect” in a pediatric population and noted  
378 significantly greater amount of deformation required for nonlinear normalization to the MNI152  
379 adult template than compared to an age-appropriate template (2.2 vs. 1.7 mm). Further, the  
380 authors also noted significant differences in both volume-based and surface-based morphological  
381 features between data warped to pediatric and adult brain templates. Such discrepancies are also  
382 reported in aging studies, where use of young-adult template (such as the MNI) for older adults can  
383 result in biases such as regional distortion and systematic over-expansion of older brains [Buckner  
384 et al., 2004]. Age-appropriate template for older adults have also been shown to provide more accu-  
385 rate tissue segmentation for structural imaging [Fillmore et al., 2015] and more focused activation  
386 patterns with improvement in sensitivity for fMRI group analyses [Huang et al., 2010].

387 In addition to age, consideration should also be given to the ethnic or population-specific differences  
388 [Lee et al., 2005, Tang et al., 2010, Rao et al., 2017], when choosing the appropriate brain template.  
389 As expected, there are noticeable structural differences when comparing the new IBTs with existing,  
390 popular standard templates (such as the MNI), which have been made from very different subject  
391 populations. Overall, registration to the IBTs from the Indian population validation groups required  
392 much less deformation of the input datasets and resulted in more accurate stereotactic standard-  
393 ization and anatomical localization. The relative differences in warping along the major axes of  
394 the brain were shown here using validation groups from the local population. The differences in  
395 warping magnitudes varied both by axis and by the age of subjects. Thus, the structural differences  
396 in templates are not trivial, i.e., just scaling, but instead reflect shape variations that are likely to  
397 significantly affect the overall goodness-of-fit and anatomical alignment across a group study.

398 Such aspects were highlighted in the differences of outcomes in fMRI processing when using IBT vs  
399 MNI templates: the IBT-based output tended to have higher ReHo values among ROI pairs. The  
400 latter fact in particular suggests that the IBTs provided better function-to-anatomical alignment  
401 across groups, so that voxel with functionally similar time series tended to be grouped together more  
402 preferentially. One might expect this to be a relatively small effect, because alignment to the MNI  
403 templates still appears generally reasonable; one would expect the overlap pattern differences to be  
404 occurring fractionally within ROIs and predominantly at boundaries. Indeed, the FC differences



405 were relatively small, but with a noticeable trend toward higher values in the IBT-based datasets.

406 It is important to emphasize that these structural differences are only with regards to morphology;  
407 they do not relate to functional or behavioral outcomes, nor to intelligence, etc. The purpose and  
408 goal of population-specific templates is for the practical consideration of maximizing the matching  
409 of structures across a group during an alignment step of processing, as well as to better match  
410 functional regions to structures. These are geometric and signal-to-noise considerations, which are  
411 important in brain studies (as demonstrated here), but which are unrelated to the brain behavior  
412 itself.

413 The wide variety of brain structural patterns in any group, even in an apparently homogeneous  
414 one, is also worth commenting on. This inherent variability affects both the creation and utilization  
415 of brain templates [Yang et al., 2020]. In any population brain structures can vary to the degree  
416 of having different numbers of sulci in the same region (e.g., [Thompson et al., 1996] and *op cit*);  
417 this is true even in a group of controls who are highly localized, genetically related, similar age and  
418 background, etc. Thus, there is a minimum and nontrivial degree of variability in alignment that  
419 one can reasonably expect both when combining multiple subjects to generate a template, as well as  
420 in the overlap of anatomical structures when applying the template. Indeed, the Indian population  
421 (currently over 1.3 billion people) is spread across a wide range of geographies with diversity in  
422 linguistic-ethnic compositions as well as extensive genetic admixtures [Basu et al., 2016]. In this  
423 study, the final mean template for each cohort contained variability. However, this was relatively  
424 low compared to the mean dataset values, and the final mean template contained a large amount of  
425 clearly defined structure. Moreover, the fractional overlap of ROIs when generating the maximum  
426 probability map atlases showed a high degree of agreement across the group through most of the  
427 brain.

428 The variability present in the template generation is also observable in the atlases. The inter-  
429 subject variability (as measured by the mean deformation values for various regions during non-linear  
430 registration to age and population-specific template) also correlated positively with the expansion  
431 of MPM volumes, in all age groups (see Supplementary Figure S7). While the final MPM atlases  
432 indicate the most frequent positions of each brain region in a given cohort, we also provide the  
433 probability density maps for each ROI in the atlas (see supplementary Figure S8 for example),  
434 which can be of additional use in ROI-based analyses.

435 While spatial normalization to IBT offers distinct advantages in terms of spatial accuracy and  
436 detection power, it may still be desirable to have the results from any particular analysis also  
437 reported in another space. For example, for comparisons with previously published studies, one  
438 might want to compare the locations of a finding with those reported in MNI, Talairach or Korean  
439 template coordinate spaces. Therefore, a nonlinear coordinate transformation mapping between

440 IBT and the common MNI space has also been calculated, and a similar coordinate warp between  
441 *any* coordinate frames can be calculated easily.

442 There are several methodological strengths and limitations related to the current study that should  
443 be noted. We used combined state-of-the-art linear and non-linear averaging techniques using  
444 AFNI's completely automated pipeline "make\_template\_dask.py", which uses the Dask python  
445 parallelization to efficiently make a template from a large group of subjects. We addressed several  
446 specific challenges involved in the template creation, such as intensity normalization from different  
447 scanners, scaling, resizing of the overall brain size to be representative of the cohort at each iteration,  
448 and anisotropic smoothing with preservation of edges. While the overall sample size of the study  
449 was relatively large, the late childhood and the late adulthood templates had relative modest sample  
450 sizes. Therefore, it will be of benefit for the constructed templates to continue to be updated with  
451 larger sample sizes as we collect more MRI datasets. Future work should also expand the templates  
452 for ages  $< 6$  yr and  $> 60$  yr. We will also expand this work to include development of a cortical  
453 surface atlas, which may allow for a registration procedure involving alignment of highly variable  
454 cortical folding patterns.

## 455 5 Conclusions

456 In conclusion, the present work demonstrates the appropriateness of using age and population-  
457 specific templates as reference targets for spatial normalization of structural and functional neu-  
458 roimaging data. This database of age-specific IBTs and IBTAs is made freely available to the wider  
459 neuroimaging community of researchers and clinicians worldwide. We hope that these tools will fa-  
460 cilitate research into neurological understand in general and into the functional and morphometric  
461 changes that occur over life-course in Indian population in particular.

## 462 Data Availability Statement

463 The Indian brain templates (IBTs) and atlases (IBTAs) developed in this study are openly available  
464 for use in AFNI. Instructions for downloading the datasets are available at [https://hollabharath.  
465 github.io/IndiaBrainTemplates](https://hollabharath.github.io/IndiaBrainTemplates). The installer script is also available from Zenodo at [https:  
466 //doi.org/10.5281/zenodo.3817045](https://doi.org/10.5281/zenodo.3817045).

## 467 **Declaration of competing interest**

468 The authors have no financial or competing interests to declare.

## 469 **Author Contributions**

470 VB, RDB, BH, PAT and DRG conceptualized and designed the study. VB, RDB, PP, GV, UMM,  
471 JS, MK, KK, AC and DB contributed data to the study. BH, PAT, NV and DPO curated the  
472 data. BH and PAT conducted data quality assessments. BH, PAT, DRG and JAL conducted the  
473 computations required for template construction. GV and NPR contributed data for the validation  
474 experiments. BH and PAT conducted the validation experiments. BH and PAT took the lead in  
475 writing the manuscript. DRG, GJB, RDB, RWC and VB contributed to the interpretation of the  
476 findings and edited the manuscript for important intellectual content. All authors discussed the  
477 results and contributed to the final manuscript.

## 478 **Acknowledgments**

479 This work was partially supported by c-VEDA (Consortium on Vulnerability to Externalizing Disor-  
480 ders and Addictions) ICMR (India)/MRC (UK) (grant ICMR/MRC-UK/3/M/2015-NCD-I) to VB  
481 and GS. Wellcome Trust/DBT India Alliance Fellowship Grants to BH (Award: IA/RTF/14/1/1002),  
482 and UMM (Award: IA/E/12/1/500755), DST Research Grant SR/CSI/44/2008(5) to RDB and  
483 DBT Research Grant BT/PR14315/MED/30/474/2010 to PKP. GV acknowledges the support of  
484 the SwarnaJayanti Fellowship by the Department of Science and Technology, Government of In-  
485 dia (DST/SJF/LSA-02/2014–15). GS was supported by the Horizon 2020-funded ERC Advanced  
486 Grant ‘STRATIFY’ (brain network-based stratification of reinforcement-related disorders; 695313),  
487 ERANID (understanding the interplay between cultural, biological and subjective factors in drug  
488 use pathways; PR-ST-0416-10004), BRIDGET (JPND brain imaging, cognition, dementia and next  
489 generation GENomics; MR/N027558/1), the Human Brain Project (SGA 2, 785907, and SGA 3,  
490 945539), the National Institute of Health (NIH) (R01DA049238, A decentralized macro and mi-  
491 cro gene-by-environment interaction analysis of substance use behavior and its brain biomarkers).  
492 DRG, JAL, PAT and RWC were supported by the NIMH and NINDS Intramural Research Pro-  
493 grams (ZICMH002888) of the NIH (HHS, USA). This work utilized the computational resources of  
494 the NIH HPC Biowulf cluster (<http://hpc.nih.gov>).

## 495 References

- 496 Analabha Basu, Neeta Sarkar-Roy, and Partha P. Majumder. Genomic reconstruction of the history  
497 of extant populations of india reveals five distinct ancestral components and a complex structure.  
498 *Proceedings of the National Academy of Sciences*, 113(6):1594–1599, January 2016. doi: 10.1073/  
499 pnas.1513197113. URL <https://doi.org/10.1073/pnas.1513197113>.
- 500 G. V. Bhalerao, R. Parlikar, R. Agrawal, V. Shivakumar, S. V. Kalmady, N. P. Rao, S. M. Agarwal,  
501 J. C. Narayanaswamy, Y. C. J. Reddy, and G. Venkatasubramanian. Construction of population-  
502 specific indian mri brain template: Morphometric comparison with chinese and caucasian tem-  
503 plates. *Asian J Psychiatr*, 35:93–100, 2018. ISSN 1876-2026 (Electronic) 1876-2018 (Linking).  
504 doi: 10.1016/j.ajp.2018.05.014. URL <https://www.ncbi.nlm.nih.gov/pubmed/29843077>.
- 505 Randy L. Buckner, Denise Head, Jamie Parker, Anthony F. Fotenos, Daniel Marcus, John C. Morris,  
506 and Abraham Z. Snyder. A unified approach for morphometric and functional data analysis in  
507 young, old, and demented adults using automated atlas-based head size normalization: reliability  
508 and validation against manual measurement of total intracranial volume. *NeuroImage*, 23(2):724–  
509 738, October 2004. doi: 10.1016/j.neuroimage.2004.06.018. URL [https://doi.org/10.1016/j.](https://doi.org/10.1016/j.neuroimage.2004.06.018)  
510 [neuroimage.2004.06.018](https://doi.org/10.1016/j.neuroimage.2004.06.018).
- 511 R. W. Cox. Afni: software for analysis and visualization of functional magnetic resonance neuroim-  
512 ages. *Comput Biomed Res*, 29(3):162–73, 1996. ISSN 0010-4809 (Print) 0010-4809 (Linking). doi:  
513 10.1006/cbmr.1996.0014. URL <https://www.ncbi.nlm.nih.gov/pubmed/8812068>.
- 514 RW Cox and DR Glen. Nonlinear warping in afni. In *Poster presented at the 19th Annual Meeting*  
515 *of the Organization for Human Brain Mapping*, 2013.
- 516 Dask Development Team. *Dask: Library for dynamic task scheduling*, 2016. URL [https://dask.](https://dask.org)  
517 [org](https://dask.org).
- 518 R. S. Desikan, F. Segonne, B. Fischl, B. T. Quinn, B. C. Dickerson, D. Blacker, R. L. Buckner,  
519 A. M. Dale, R. P. Maguire, B. T. Hyman, M. S. Albert, and R. J. Killiany. An automated  
520 labeling system for subdividing the human cerebral cortex on mri scans into gyral based regions  
521 of interest. *Neuroimage*, 31(3):968–80, 2006. ISSN 1053-8119 (Print) 1053-8119 (Linking). doi:  
522 10.1016/j.neuroimage.2006.01.021. URL <https://www.ncbi.nlm.nih.gov/pubmed/16530430>.
- 523 Christophe Destrieux, Bruce Fischl, Anders Dale, and Eric Halgren. Automatic parcellation of  
524 human cortical gyri and sulci using standard anatomical nomenclature. *Neuroimage*, 53(1):1–15,  
525 2010. ISSN 1053-8119.
- 526 Alan C Evans, D Louis Collins, SR Mills, ED Brown, RL Kelly, and Terry M Peters. 3d statistical

- 527 neuroanatomical models from 305 mri volumes. In *1993 IEEE conference record nuclear science*  
528 *symposium and medical imaging conference*, pages 1813–1817. IEEE, 1993.
- 529 Paul T. Fillmore, Michelle C. Phillips-Meek, and John E. Richards. Age-specific MRI brain and head  
530 templates for healthy adults from 20 through 89 years of age. *Frontiers in Aging Neuroscience*, 7,  
531 April 2015. doi: 10.3389/fnagi.2015.00044. URL <https://doi.org/10.3389/fnagi.2015.00044>.
- 532 B. Fischl. Freesurfer. *Neuroimage*, 62(2):774–81, 2012. ISSN 1095-9572 (Electronic) 1053-  
533 8119 (Linking). doi: 10.1016/j.neuroimage.2012.01.021. URL [https://www.ncbi.nlm.nih.gov/  
534 pubmed/22248573](https://www.ncbi.nlm.nih.gov/pubmed/22248573).
- 535 V. Fonov, A. C. Evans, K. Botteron, C. R. Almli, R. C. McKinstry, D. L. Collins, and Group  
536 Brain Development Cooperative. Unbiased average age-appropriate atlases for pediatric studies.  
537 *Neuroimage*, 54(1):313–27, 2011. ISSN 1095-9572 (Electronic) 1053-8119 (Linking). doi: 10.1016/  
538 j.neuroimage.2010.07.033. URL <https://www.ncbi.nlm.nih.gov/pubmed/20656036>.
- 539 Chih-Mao Huang, Shwu-Hua Lee, Ing-Tsung Hsiao, Wan-Chun Kuan, Yau-Yau Wai, Han-Jung Ko,  
540 Yung-Liang Wan, Yuan-Yu Hsu, and Ho-Ling Liu. Study-specific EPI template improves group  
541 analysis in functional MRI of young and older adults. *Journal of Neuroscience Methods*, 189(2):  
542 257–266, June 2010. doi: 10.1016/j.jneumeth.2010.03.021. URL [https://doi.org/10.1016/j.  
543 jneumeth.2010.03.021](https://doi.org/10.1016/j.jneumeth.2010.03.021).
- 544 M. G. Kendall and B. Babington Smith. The problem of  $m$  rankings. *Ann. Math. Statist.*, 10  
545 (3):275–287, 09 1939. doi: 10.1214/aoms/1177732186. URL [https://doi.org/10.1214/aoms/  
546 1177732186](https://doi.org/10.1214/aoms/1177732186).
- 547 Jae Sung Lee, Dong Soo Lee, Jinsu Kim, Yu Kyeong Kim, Eunjoo Kang, Hyejin Kang, Keon Wook  
548 Kang, Jong Min Lee, Jae-Jin Kim, and Hae-Jeong Park. Development of korean standard brain  
549 templates. *Journal of Korean medical science*, 20(3):483–488, 2005. ISSN 1011-8934.
- 550 X. Li, P. S. Morgan, J. Ashburner, J. Smith, and C. Rorden. The first step for neuroimaging  
551 data analysis: Dicom to nifti conversion. *J Neurosci Methods*, 264:47–56, 2016. ISSN 1872-  
552 678X (Electronic) 0165-0270 (Linking). doi: 10.1016/j.jneumeth.2016.03.001. URL [https://  
553 www.ncbi.nlm.nih.gov/pubmed/26945974](https://www.ncbi.nlm.nih.gov/pubmed/26945974).
- 554 John Mazziotta, Arthur Toga, Alan Evans, Peter Fox, Jack Lancaster, Karl Zilles, Roger Woods,  
555 Tomas Paus, Gregory Simpson, Bruce Pike, et al. A four-dimensional probabilistic atlas of the  
556 human brain. *Journal of the American Medical Informatics Association*, 8(5):401–430, 2001a.
- 557 John Mazziotta, Arthur Toga, Alan Evans, Peter Fox, Jack Lancaster, Karl Zilles, Roger Woods,  
558 Tomas Paus, Gregory Simpson, Bruce Pike, et al. A probabilistic atlas and reference system for

- 559 the human brain: International consortium for brain mapping (icbm). *Philosophical Transactions*  
560 *of the Royal Society of London. Series B: Biological Sciences*, 356(1412):1293–1322, 2001b.
- 561 Praful P. Pai, Pravat K. Mandal, Khushboo Punjabi, Deepika Shukla, Anshika Goel, Shallu Joon,  
562 Saurav Roy, Kanika Sandal, Ritwick Mishra, and Ritu Lahoti. BRAHMA: Population specific t1,  
563 t2, and FLAIR weighted brain templates and their impact in structural and functional imaging  
564 studies. *Magnetic Resonance Imaging*, 70:5–21, July 2020. doi: 10.1016/j.mri.2019.12.009. URL  
565 <https://doi.org/10.1016/j.mri.2019.12.009>.
- 566 N. P. Rao, H. Jeelani, R. Achalia, G. Achalia, A. Jacob, R. D. Bharath, S. Varambally, G. Venkata-  
567 subramanian, and K. Yalavarthy P. Population differences in brain morphology: Need for  
568 population specific brain template. *Psychiatry Res Neuroimaging*, 265:1–8, 2017. ISSN 1872-  
569 7506 (Electronic) 0925-4927 (Linking). doi: 10.1016/j.psychres.2017.03.018. URL <https://www.ncbi.nlm.nih.gov/pubmed/28478339>.
- 570
- 571 Z. S. Saad, D. R. Glen, G. Chen, M. S. Beauchamp, R. Desai, and R. W. Cox. A new method for  
572 improving functional-to-structural mri alignment using local pearson correlation. *Neuroimage*, 44  
573 (3):839–48, 2009. ISSN 1095-9572 (Electronic) 1053-8119 (Linking). doi: 10.1016/j.neuroimage.  
574 2008.09.037. URL <https://www.ncbi.nlm.nih.gov/pubmed/18976717>.
- 575 Eesha Sharma, Nilakshi Vaidya, Udita Iyengar, Yuning Zhang, Bharath Holla, Meera Purushottam,  
576 Amit Chakrabarti, Gwen Sascha Fernandes, Jon Heron, Matthew Hickman, Sylvane Desrivieres,  
577 Kamakshi Kartik, Preeti Jacob, Madhavi Rangaswamy, Rose Dawn Bharath, Gareth Barker,  
578 Dimitri Papadopoulos Orfanos, Chirag Ahuja, Pratima Murthy, Sanjeev Jain, Mathew Vargh-  
579 ese, Deepak Jayarajan, Keshav Kumar, Kandavel Thennarasu, Debashish Basu, B. N. Sub-  
580 odh, Rebecca Kuriyan, Sunita Simon Kurpad, Kumaran Kalyanram, Ghattu Krishnaveni, Mu-  
581 rali Krishna, Rajkumar Lenin Singh, L. Roshan Singh, Kartik Kalyanram, Mireille Toledano,  
582 Gunter Schumann, Vivek Benegal, and The cVEDA Consortium. Consortium on vulnerabil-  
583 ity to externalizing disorders and addictions (cveda): A developmental cohort study proto-  
584 col. *BMC Psychiatry*, 20(1):2, 2020. ISSN 1471-244X. doi: 10.1186/s12888-019-2373-3. URL  
585 <https://doi.org/10.1186/s12888-019-2373-3>.
- 586 J. Sivaswamy, A. J. Thottupattu, R. Mehta, R. Sheelakumari, and C. Kesavadas. Construction  
587 of indian human brain atlas. *Neurol India*, 67(1):229–234, 2019. ISSN 0028-3886 (Print) 0028-  
588 3886 (Linking). doi: 10.4103/0028-3886.253639. URL <https://www.ncbi.nlm.nih.gov/pubmed/30860125>.
- 589
- 590 Jean Talairach and Pierre Tournoux. Co-planar stereotaxic atlas of the human brain-3-dimensional  
591 proportional system. *An approach to cerebral imaging*, 1988.

- 592 Y. Tang, C. Hojatkashani, I. D. Dinov, B. Sun, L. Fan, X. Lin, H. Qi, X. Hua, S. Liu, and A. W.  
593 Toga. The construction of a chinese mri brain atlas: a morphometric comparison study between  
594 chinese and caucasian cohorts. *Neuroimage*, 51(1):33–41, 2010. ISSN 1095-9572 (Electronic)  
595 1053-8119 (Linking). doi: 10.1016/j.neuroimage.2010.01.111. URL [https://www.ncbi.nlm.nih.  
596 gov/pubmed/20152910](https://www.ncbi.nlm.nih.gov/pubmed/20152910).
- 597 Paul A Taylor and Ziad S Saad. Fatcat:(an efficient) functional and tractographic connectivity  
598 analysis toolbox. *Brain connectivity*, 3(5):523–535, 2013.
- 599 P. M. Thompson, C. Schwartz, R. T. Lin, A. A. Khan, and A. W. Toga. Three-dimensional statistical  
600 analysis of sulcal variability in the human brain. *J Neurosci*, 16(13):4261–74, 1996. ISSN 0270-  
601 6474 (Print) 0270-6474 (Linking). URL <https://www.ncbi.nlm.nih.gov/pubmed/8753887>.
- 602 M. Wilke, V. J. Schmithorst, and S. K. Holland. Assessment of spatial normalization of whole-brain  
603 magnetic resonance images in children. *Hum Brain Mapp*, 17(1):48–60, 2002. ISSN 1065-9471  
604 (Print) 1065-9471 (Linking). doi: 10.1002/hbm.10053. URL [https://www.ncbi.nlm.nih.gov/  
605 pubmed/12203688](https://www.ncbi.nlm.nih.gov/pubmed/12203688).
- 606 Guoyuan Yang, Sizhong Zhou, Jelena Bozek, Hao-Ming Dong, Meizhen Han, Xi-Nian Zuo, Hesheng  
607 Liu, and Jia-Hong Gao. Sample sizes and population differences in brain template construction.  
608 *NeuroImage*, 206:116318, February 2020. doi: 10.1016/j.neuroimage.2019.116318. URL [https:  
609 //doi.org/10.1016/j.neuroimage.2019.116318](https://doi.org/10.1016/j.neuroimage.2019.116318).
- 610 U. Yoon, V. S. Fonov, D. Perusse, A. C. Evans, and Group Brain Development Cooperative. The  
611 effect of template choice on morphometric analysis of pediatric brain data. *Neuroimage*, 45(3):  
612 769–77, 2009. ISSN 1095-9572 (Electronic) 1053-8119 (Linking). doi: 10.1016/j.neuroimage.2008.  
613 12.046. URL <https://www.ncbi.nlm.nih.gov/pubmed/19167509>.
- 614 Yufeng Zang, Tianzi Jiang, Yingli Lu, Yong He, and Lixia Tian. Regional homogeneity approach  
615 to fmri data analysis. *Neuroimage*, 22(1):394–400, 2004.
- 616 Y. Zhang, N. Vaidya, U. Iyengar, E. Sharma, B. Holla, C. K. Ahuja, G. J. Barker, D. Basu, R. D.  
617 Bharath, A. Chakrabarti, S. Desrivieres, P. Elliott, G. Fernandes, A. Gourisankar, J. Heron,  
618 M. Hickman, P. Jacob, S. Jain, D. Jayarajan, K. Kalyanram, K. Kartik, M. Krishna, G. Kr-  
619 ishnaveni, K. Kumar, K. Kumaran, R. Kuriyan, P. Murthy, D. P. Orfanos, M. Purushottam,  
620 M. Rangaswamy, S. S. Kupard, L. Singh, R. Singh, B. N. Subodh, K. Thennarasu, M. Toledano,  
621 M. Varghese, V. Benegal, G. Schumann, and Veda consortium c. The consortium on vulnerability  
622 to externalizing disorders and addictions (c-veda): an accelerated longitudinal cohort of children  
623 and adolescents in india. *Mol Psychiatry*, 2020. ISSN 1476-5578 (Electronic) 1359-4184 (Linking).  
624 doi: 10.1038/s41380-020-0656-1. URL <https://www.ncbi.nlm.nih.gov/pubmed/32203154>.

## Supplementary Information

This section provides supplementary figures and codes to the material in the main text.

The **contrast-to-noise ratio (CNR)** between GM and WM for successive template creation steps (Figure S1) was calculated as

$$CNR = \frac{|mean(SI_{GM}) - mean(SI_{WM})|}{\sqrt{SD_{GM}^2} + \sqrt{SD_{WM}^2}} \quad (1)$$

where  $SI_{GM}$  /  $SI_{WM}$  and  $SD_{GM}/SD_{WM}$  are mean signal intensity within the gray and white matter respectively, and the corresponding standard deviations.

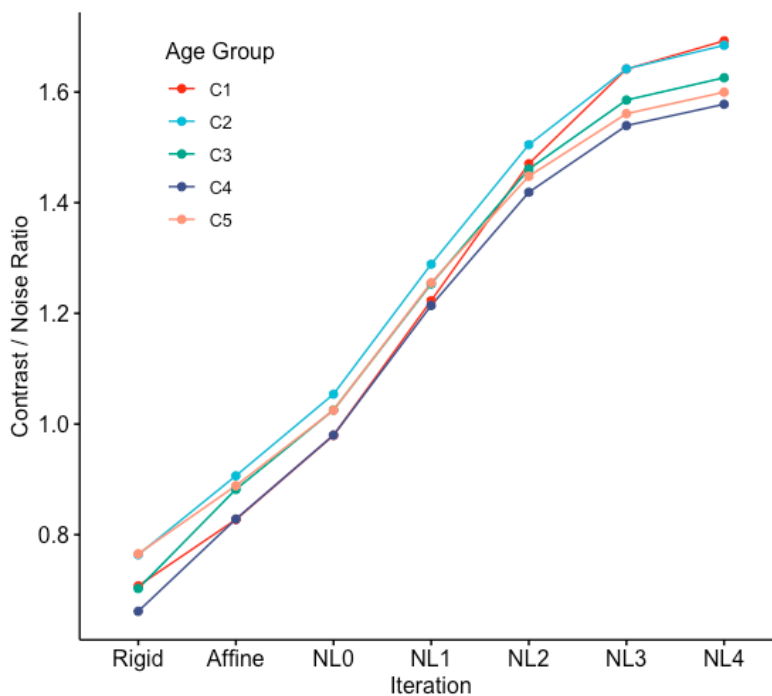

Figure S1: The CNR between GM and WM improves consistently across the successive template creation stages in all the template age-groups C1-C5.



## Age-specific Indian brain templates

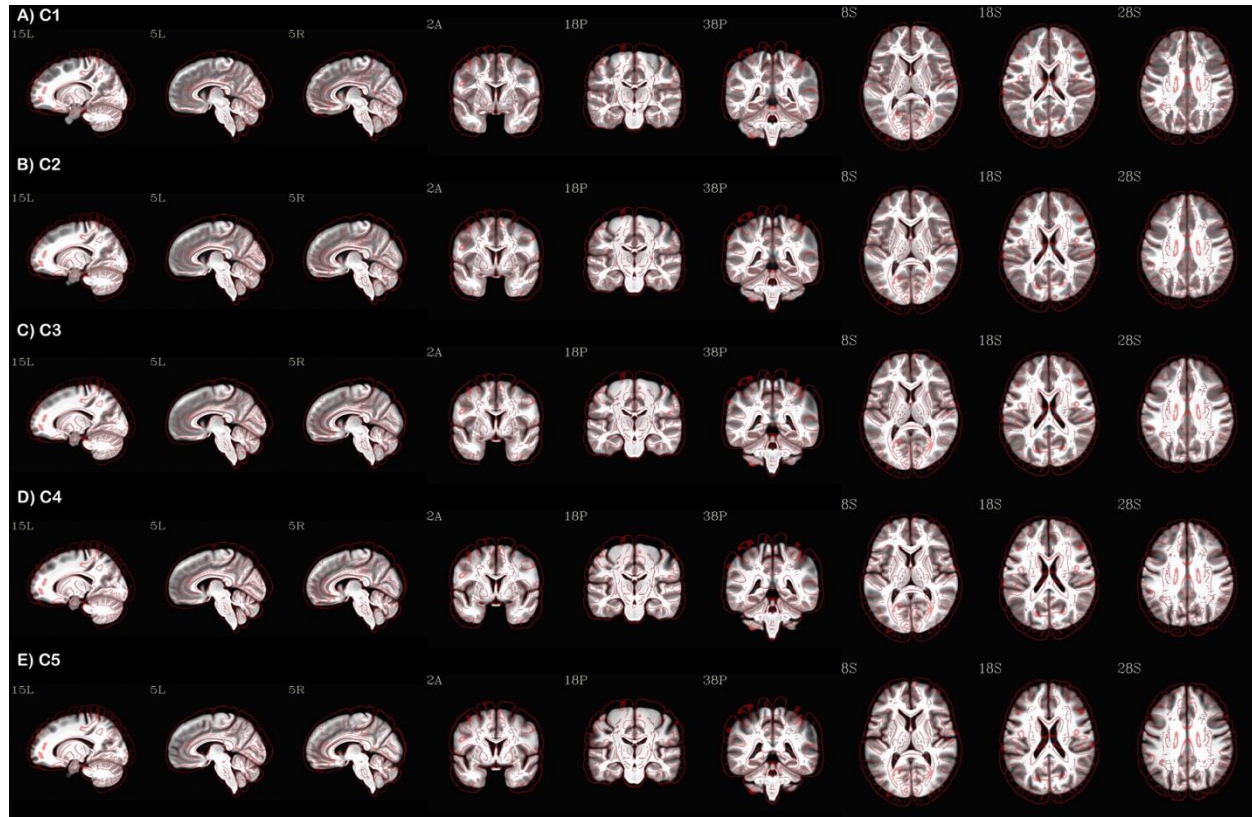

Figure S2: The five IBTs (C1-5) with three sets of sagittal, coronal and axial view displayed as underlay in grayscale and edge-filtered version of the MNI 2009 non-linear template mask as overlay for size comparison. High tissue contrast and detail are evident in each case.

## Age-specific Indian brain templates

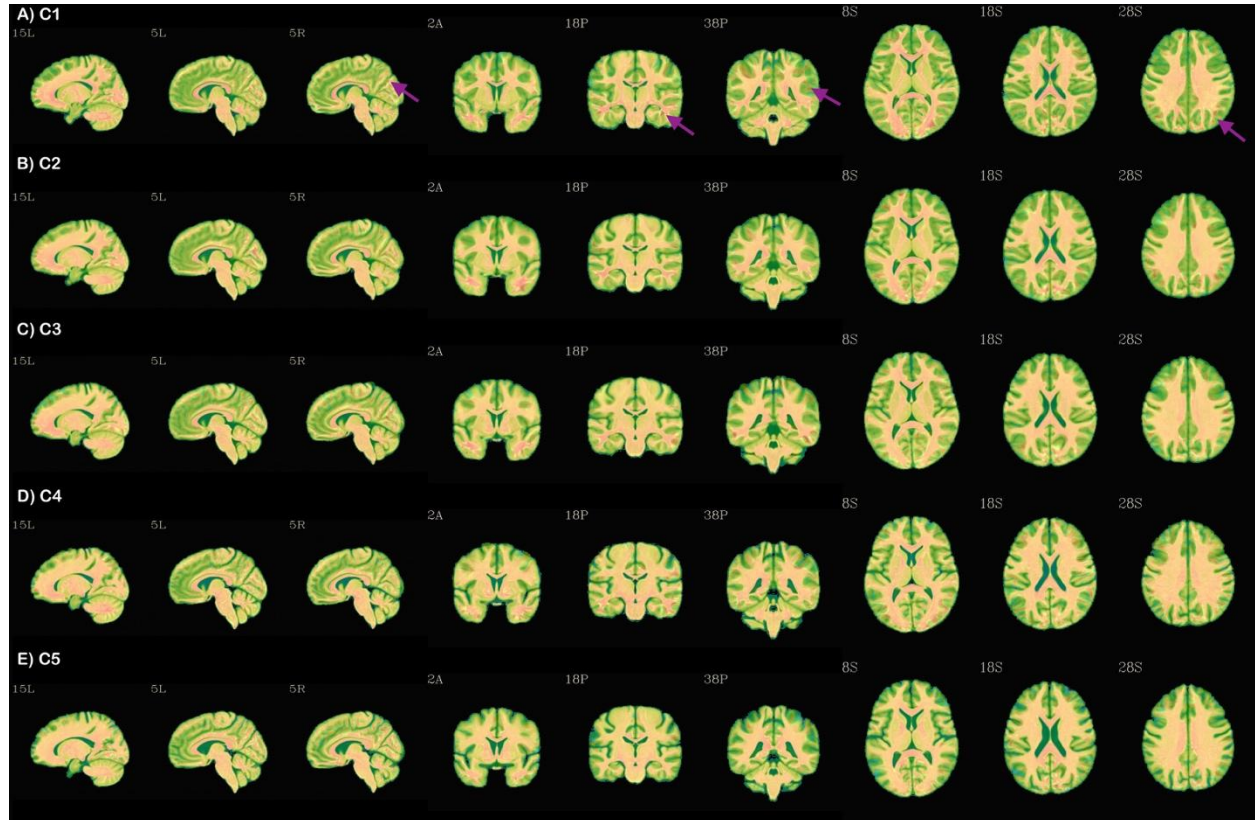

Figure S3: The five population-average IBTs (C1-5) with three sets of sagittal, coronal and axial view displayed as underlay in grayscale and the respective typical subject for each IBT version as the overlay. Arrow points to example regions in C1 age-band regions where the typical version provides greater details than the underlying population-average version.

## Age-specific Indian brain templates

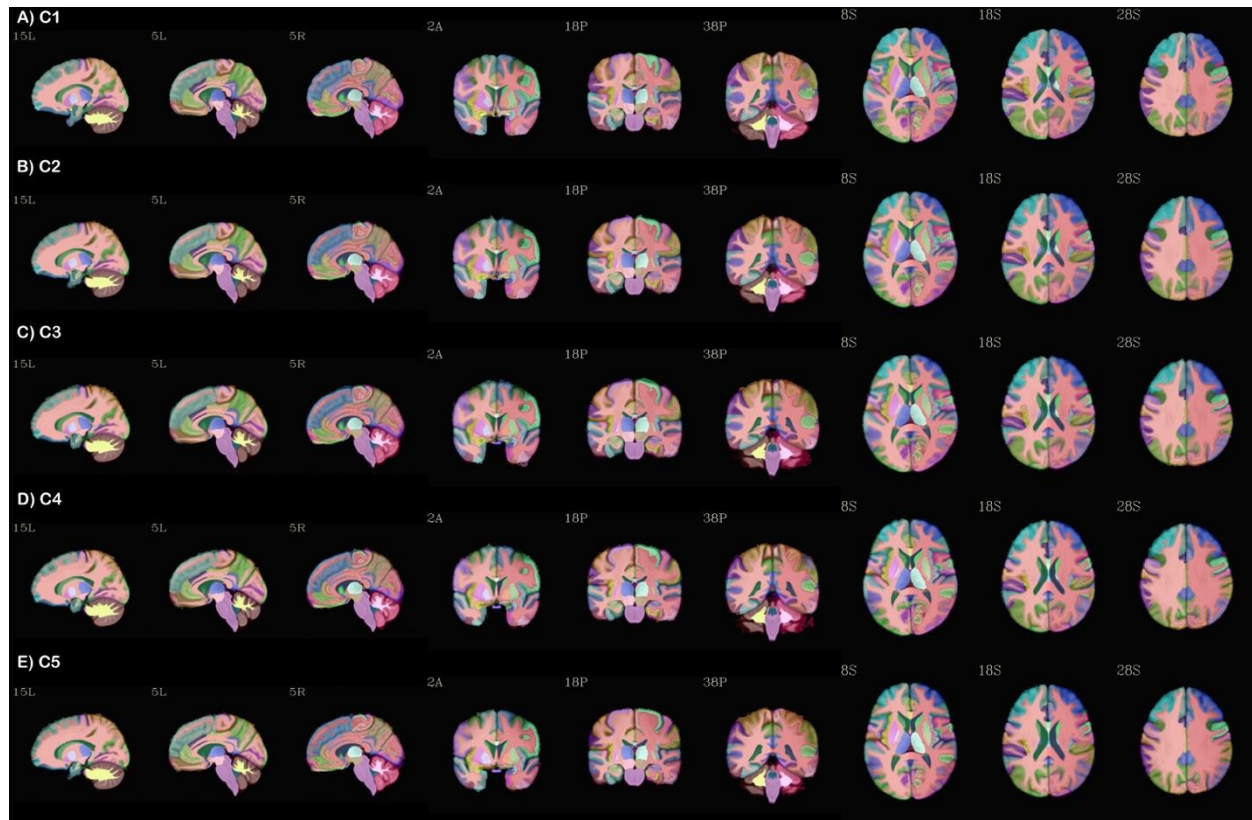

Figure S4: The five IBTs (C1-5) with three sets of sagittal, coronal and axial view displayed as underlay in grayscale and the respective Indian maximum probability map version of the DK atlas (FreeSurfer's 2000 Atlas) as overlay in AFNI's "ROI\_i256" color scale.

## Age-specific Indian brain templates

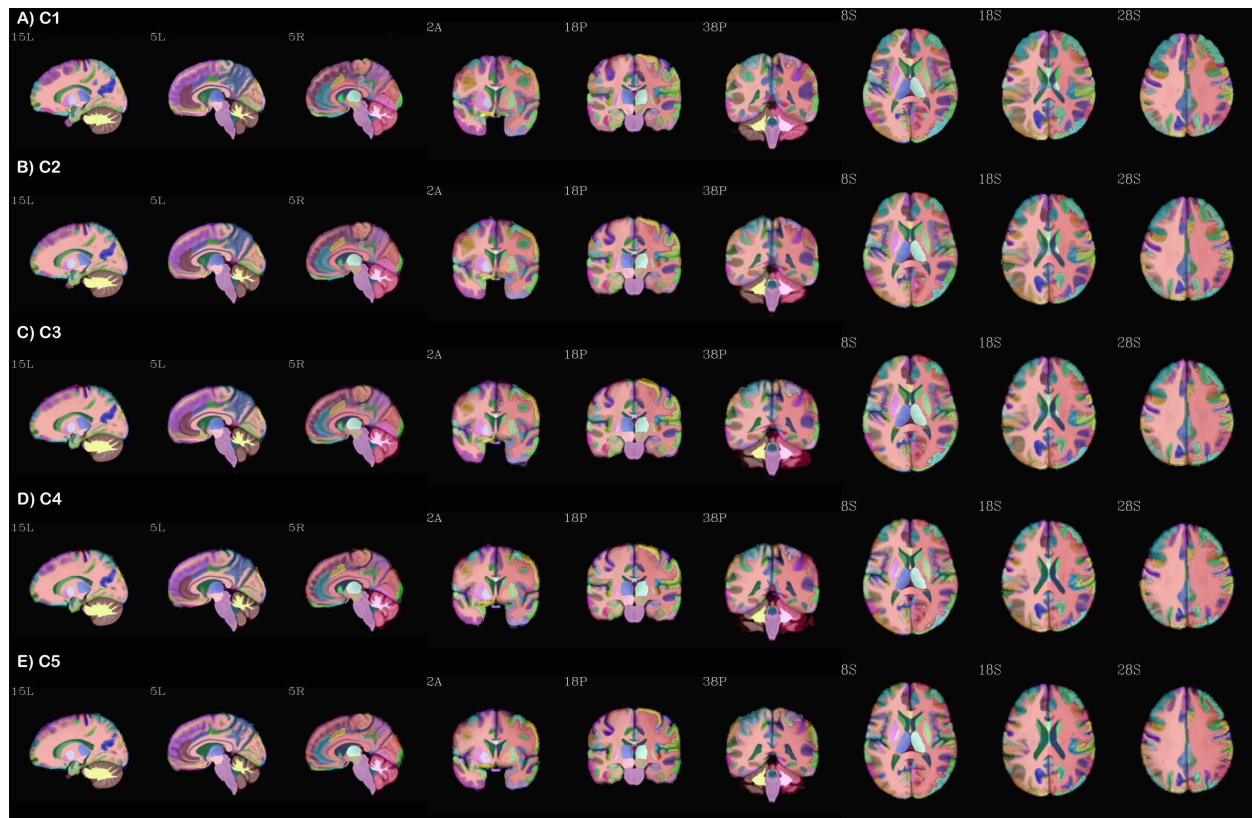

Figure S5: The five IBTs (C1-5) with three sets of sagittal, coronal and axial view displayed as underlay in grayscale and the respective Indian maximum probability map version of the Destrieux atlas (FreeSurfer's 2009 Atlas) as overlay in AFNI's "ROI\_i256" color scale.

## Age-specific Indian brain templates

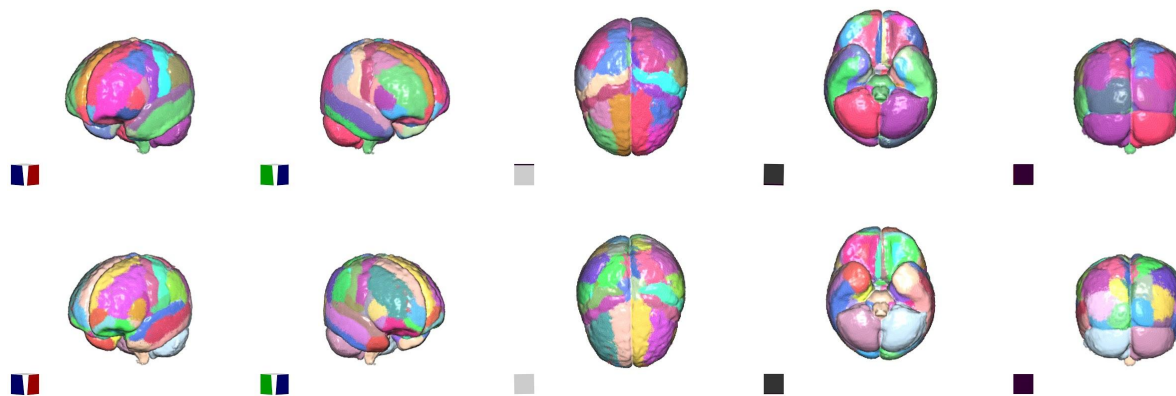

Figure S6: 3D surface view of the brain atlases for the C1-IBT age band. The top row shows the maximum probability map (MPM) version of the DK atlas (FreeSurfer's 2000 Atlas) and the bottom row shows MPM version of the Destrieux atlas (FreeSurfer's 2009 Atlas) for the C1 age band.

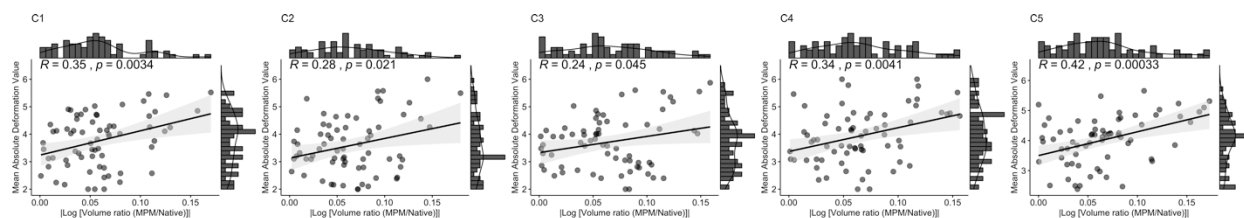

Figure S7: Scatterplot with marginal densigram for pairwise correlations between absolute values of logarithm of the relative volume ratios and mean absolute deformation value across all the regions in the maximum probability map (MPM) version of the DK atlas (FreeSurfer's 2000 Atlas) at each age-group C1-C5.

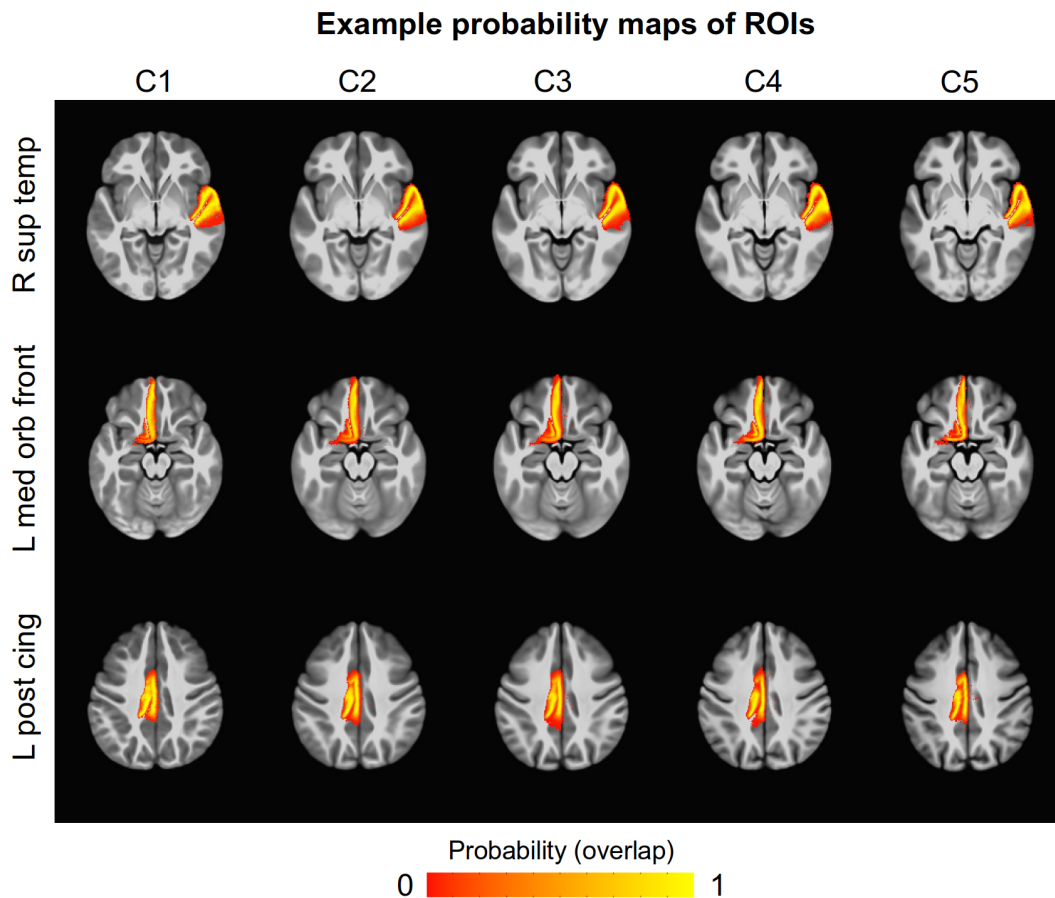

Figure S8: Axial views for three example region of interest from MPM-2000 IBT atlas for all the age groups. The top row shows probability map for right superior temporal gyrus, middle row shows left medial orbital frontal gyrus and the bottom row shows left posterior cingulate gyrus. The color intensity reflects probability density estimates (ranging from 0 to 1)

**Supplementary Information:**

Example afni\_proc.py command for comparing validation tests.

```
#!/bin/bash

subj=$1          # subject ID
topdir=$2        # group level directory for input
outdir=$3        # group level directory for output
btemplate=$4     # brain template name

tpath=`@FindAfnIDsetPath ${btemplate}`
sdir=${topdir}/${subj}

\mkdir -p ${outdir}

afni_proc.py \
  -subj_id      ${subj} \
  -out_dir      ${outdir}/${subj}.results \
  -blocks       despikes tshift align tlrc volreg mask regress \
  -copy_anat    ${sdir}/anatSS.${subj}.nii \
  -anat_has_skull no \
  -dsets        ${sdir}/${subj}_rest.nii.gz \
  -tcats_remove_first_trs 3 \
  -align_opts_aea -ginormous_move -deoblique on \
  -check_flip   -cost lpc+ZZ \
  -mask_epi_anat yes \
  -volreg_align_to MIN_OUTLIER \
  -volreg_align_e2a \
  -volreg_tlrc_warp \
  -tlrc_base     ${tpath}/${btemplate} \
  -tlrc_NL_warp \
  -tlrc_NL_warped_dsets \
  ${sdir}/anatQQ.${subj}.nii \
  ${sdir}/anatQQ.${subj}.aff12.1D \
  ${sdir}/anatQQ.${subj}_WARP.nii \
  -volreg_warp_dxyz 3 \
  -mask_segment_anat yes \
  -regress_censor_outliers 0.1 \
  -regress_censor_motion 0.3 \
  -regress_apply_mot_types demean deriv \
  -regress_est_blur_errts \
  -html_review_style pythonic \
  -execute
```
